# Supplementary material
Source: publisher figshare collection journal article supplement (https://gsapubs.figshare.com/ndownloader/files/33897764)
Supplement: Supplementary file 1 [file 33897764]

## Sheet: Table S5
Table S5 Zircon Lu-Hf isotope and oxygen isotope compositions of the pelitic and mafic migmatites
Sample No.	Domain	176Hf/177Hf	2σ	176Lu/177Hf	2σ	176Yb/177Hf	2σ	(176Hf/177Hf)i	εHf(0)	Age (Ma)	εHf(t)	±(2s)	δ18O	2σ
Pelitic migmatites
1-33
1-33-01	Metamorphic rim	0.282988	9.9204e-06	0.00014257	2.00303e-05	0.004402	0.000580482	0.282988	7.65394	84.0249	9.49107	0.350827
1-33-02	Metamorphic rim	0.282948	8.45298e-06	0.000159875	1.25756e-06	0.00562247	3.61736e-05	0.282947	6.21015	86.9992	8.1111	0.298933
1-33-03	Metamorphic rim	0.282992	9.25245e-06	0.000242141	1.62732e-05	0.00720373	0.000441144	0.282991	7.77446	89.7087	9.73011	0.327205
1-33-04	Metamorphic rim	0.282938	8.31517e-06	4.13588e-05	1.82639e-07	0.00163567	6.50204e-06	0.282938	5.85982	87.1092	7.76994	0.294059
1-33-05	Metamorphic rim	0.282937	9.08965e-06	4.39602e-05	3.93438e-07	0.00169498	1.21732e-05	0.282936	5.81889	89.1974	7.77468	0.321448
1-33-06	Metamorphic rim	0.282931	9.49062e-06	1.66621e-05	2.70176e-07	0.000598978	1.07344e-05	0.282931	5.61625	80.3698	7.37972	0.335628
1-33-07	Metamorphic rim	0.282965	8.78684e-06	0.000314296	7.81613e-06	0.00971698	0.000162953	0.282965	6.84126	84.2999	8.67469	0.310739
1-33-08	Metamorphic rim	0.282976	9.35666e-06	5.94522e-05	4.69556e-07	0.00228241	1.64672e-05	0.282976	7.20942	85.4654	9.08268	0.330891
1-33-09	Metamorphic rim	0.282962	9.13065e-06	3.56288e-05	1.38259e-06	0.00133016	5.58289e-05	0.282962	6.72448	80.3601	8.48693	0.322898
1-33-10	Metamorphic rim	0.282955	8.23066e-06	1.70457e-05	7.1813e-08	0.000688438	3.10979e-06	0.282955	6.45555	83.1766	8.2808	0.291071
1-33-11	Metamorphic rim	0.282966	8.81608e-06	0.000120278	8.82032e-06	0.00326713	0.000168782	0.282966	6.87049	84.0096	8.70838	0.311773
1-33-12	Metamorphic rim	0.282953	8.53288e-06	1.27301e-05	1.83436e-07	0.000507529	7.46903e-06	0.282953	6.38756	86.7924	8.29246	0.301758
1-33-13	Metamorphic rim	0.28297	9.63817e-06	0.000116364	6.05256e-07	0.00425773	2.09452e-05	0.282969	6.98559	82.1282	8.78251	0.340846
1-33-14	Metamorphic rim	0.282972	9.30898e-06	0.000245725	1.03535e-05	0.00699474	0.000272726	0.282971	7.05526	86.1939	8.93387	0.329204
1-33-15	Metamorphic rim	0.282969	8.98215e-06	2.5073e-05	2.47316e-07	0.000963355	1.177e-05	0.282969	6.95879	82.2721	8.76382	0.317646
1-33-16	Metamorphic rim	0.282945	1.6e-05	1.823e-05	2.7e-07	0.0006526	9.8e-06	0.282945	6.118	85	7.98756	0.565827	14.1926	0.357822
1-33-17	Metamorphic rim	0.282988	2e-05	2.225e-05	5.7e-07	0.000705	1.3e-05	0.282988	7.63866	85	9.50828	0.707284	15.0585	0.327764
1-33-18	Metamorphic rim	0.282997	1.7e-05	2.291e-05	2.1e-07	0.0007763	9.7e-06	0.282997	7.95694	85	9.82658	0.601191	13.2776	0.226579
1-33-19	Metamorphic rim	0.282978	1.6e-05	4.131e-05	4.4e-07	0.00132	1.9e-05	0.282978	7.28502	85	9.1535	0.565827	13.3657	0.263227
1-33-20	Metamorphic rim	0.282972	1.9e-05	3.396e-05	5.9e-07	0.000972	1.5e-05	0.282972	7.07284	85	8.94169	0.671919	13.7664	0.243521
1-33-21	Metamorphic rim	0.282986	2e-05	7.8e-05	2.2e-06	0.002292	6.2e-05	0.282986	7.56793	85	9.4344	0.707284	13.0051	0.303492
1-33-22	Metamorphic rim	0.282977	1.7e-05	5.05e-05	2.5e-06	0.00133	5.5e-05	0.282977	7.24966	85	9.11761	0.601191	13.4305	0.29989
1-33-23	Metamorphic rim	0.282972	1.9e-05	1.95e-05	4.5e-07	0.000618	1.1e-05	0.282972	7.07284	85	8.9425	0.671919	13.6096	0.191225
1-33-24	Metamorphic rim	0.283002	2.4e-05	1.588e-05	7.3e-07	0.00045	2.3e-05	0.283002	8.13376	85	10.0038	0.84874	13.6658	0.24774
77-3
77-3-01	Metamorphic rim	0.282966	1.04148e-05	1.38038e-05	1.80147e-07	0.000506472	7.5461e-06	0.282966	6.86506	87.7118	8.7902	0.368309
77-3-02	Metamorphic rim	0.282935	9.19479e-06	1.66331e-06	6.05992e-08	7.72078e-05	2.05308e-06	0.282935	5.77742	87.9919	7.70921	0.325166
77-3-03	Metamorphic rim	0.282924	9.81996e-06	8.17781e-06	1.86319e-07	0.000305521	4.92968e-06	0.282924	5.36163	87.4709	7.28151	0.347275
77-3-04	Metamorphic rim	0.282956	1.05649e-05	8.18072e-05	2.07939e-06	0.00253067	5.31245e-05	0.282956	6.49477	86.4162	8.38749	0.37362
77-3-05	Metamorphic rim	0.28294	1.02155e-05	4.23545e-06	1.18417e-07	0.0001709	4.14853e-06	0.28294	5.94325	88.7738	7.8921	0.361262
77-3-06	Metamorphic rim	0.28295	8.3168e-06	1.0476e-05	6.20719e-08	0.000404087	2.50866e-06	0.28295	6.30534	89.4834	8.26948	0.294117
77-3-07	Metamorphic rim	0.282931	1.07022e-05	5.95313e-06	1.58132e-07	0.000231285	4.6631e-06	0.282931	5.63304	90.8655	7.62769	0.378476
77-3-08	Metamorphic rim	0.282956	8.74601e-06	2.30717e-06	5.03102e-08	9.32778e-05	2.01932e-06	0.282956	6.49815	92.44	8.5278	0.309295
77-3-09	Metamorphic rim	0.282954	8.4538e-06	5.31883e-06	1.72556e-07	0.000218613	6.45056e-06	0.282954	6.42857	89.2213	8.38728	0.298962
77-3-10	Metamorphic rim	0.282984	9.61242e-06	8.38438e-06	1.88989e-07	0.000299697	5.58501e-06	0.282984	7.5113	88.6963	9.4585	0.339935
77-3-11	Metamorphic rim	0.282944	9.1573e-06	1.12121e-05	4.38196e-07	0.000420206	1.87988e-05	0.282944	6.09699	85.2995	7.96913	0.32384
77-3-12	Metamorphic rim	0.282958	9.05419e-06	4.76346e-06	6.30623e-08	0.000177616	1.63003e-06	0.282958	6.59539	92.3645	8.62325	0.320194
77-3-13	Metamorphic rim	0.282954	9.52062e-06	8.80408e-06	1.5335e-07	0.000339812	4.65202e-06	0.282954	6.43114	83.0993	8.25514	0.336689
77-3-14	Metamorphic rim	0.282981	2.5e-05	5.2e-06	2.8e-07	0.000191	1.3e-05	0.282981	7.39111	88.4	9.33197	0.884105	10.5194	0.183071
77-3-15	Metamorphic rim	0.282962	1.6e-05	3.38e-06	1.6e-07	0.0001188	6.7e-06	0.282962	6.71919	88.4	8.66003	0.565827	11.1981	0.215697
77-3-16	Metamorphic rim	0.283005	2.4e-05	5.97e-06	3.1e-07	0.000199	1e-05	0.283005	8.23985	88.4	10.1808	0.84874	10.4995	0.284039
77-3-17	Metamorphic rim	0.282993	2.4e-05	3.51e-06	2.5e-07	0.000123	1.4e-05	0.282993	7.81548	88.4	9.75652	0.84874	10.3243	0.246151
77-3-18	Metamorphic rim	0.283002	1.5e-05	0.0003583	1.8e-06	0.009989	6e-05	0.283001	8.13376	88.4	10.0541	0.530463	10.4791	0.318332
77-3-19	Metamorphic rim	0.283014	1.9e-05	2.34e-06	2.6e-07	9.2e-05	1.1e-05	0.283014	8.55813	88.4	10.4994	0.671919	10.6997	0.241823
77-3-20	Metamorphic rim	0.282967	1.6e-05	6.45e-06	2.8e-07	0.0002	1e-05	0.282967	6.89602	88.4	8.8367	0.565827	10.62	0.140055
77-8
77-8-01	Metamorphic rim	0.282951	1.04237e-05	7.44678e-06	1.25595e-07	0.000269656	3.8285e-06	0.282951	6.33041	90.8774	8.32537	0.368624
77-8-02	Metamorphic rim	0.282945	9.63832e-06	5.76971e-05	2.38605e-06	0.00159927	6.08683e-05	0.282945	6.1227	91.5574	8.12952	0.340851
77-8-03	Metamorphic rim	0.2829	8.01855e-06	4.657e-06	6.25221e-08	0.000196061	1.97557e-06	0.2829	4.52545	85.7937	6.40852	0.283569
77-8-04	Metamorphic rim	0.282955	8.53466e-06	1.84676e-05	1.69935e-07	0.000614576	2.79362e-06	0.282955	6.47867	84.8935	8.34155	0.301821
77-8-05	Metamorphic rim	0.28294	8.05056e-06	8.3803e-06	1.11344e-07	0.00030951	5.36694e-06	0.28294	5.93317	91.2643	7.9365	0.284702
77-8-06	Metamorphic rim	0.282965	8.46837e-06	8.15388e-05	8.00586e-06	0.00227934	0.000203238	0.282965	6.84144	88.4754	8.77938	0.299477
77-8-07	Metamorphic rim	0.282957	8.75502e-06	1.18531e-05	6.90337e-08	0.000473754	1.84651e-06	0.282957	6.53677	87.0928	8.44835	0.309614
77-8-08	Metamorphic rim	0.282992	9.55064e-06	0.000143825	2.30765e-05	0.00387635	0.000541476	0.282992	7.79512	94.3649	9.85852	0.33775
77-8-09	Metamorphic rim	0.282978	8.55595e-06	0.000239979	3.52502e-06	0.0070199	0.000100761	0.282977	7.27147	88.0544	9.19105	0.302574
77-8-10	Metamorphic rim	0.282963	8.46441e-06	2.12966e-05	1.03025e-07	0.000909298	9.99627e-06	0.282963	6.75115	82.1861	8.55446	0.299337
77-8-11	Metamorphic rim	0.282944	7.99145e-06	1.73997e-05	7.36969e-08	0.000644541	1.44313e-06	0.282944	6.09897	88.92	8.05028	0.282611
77-8-12	Metamorphic rim	0.282952	9.30134e-06	2.10164e-05	6.46089e-07	0.000861032	2.98577e-05	0.282952	6.35168	89.0472	8.30563	0.328934
77-8-13	Metamorphic rim	0.282949	8.9148e-06	2.36001e-05	2.06442e-07	0.000959853	3.30153e-06	0.282949	6.27207	94.1519	8.33797	0.315265
77-8-14	Metamorphic rim	0.282954	8.55242e-06	2.57705e-05	1.59757e-07	0.000930419	4.59552e-06	0.282954	6.44822	93.4773	8.4992	0.302449
77-9
77-9-01	Metamorphic rim	0.282939	8.72122e-06	2.43573e-05	1.32664e-07	0.000883309	7.69271e-06	0.282939	5.89753	88.1221	7.83087	0.308419
77-9-02	Metamorphic rim	0.282979	1.88215e-05	1.30814e-05	2.19112e-07	0.000526047	1.49914e-05	0.282979	7.33579	88.8417	9.28589	0.665605
77-9-03	Metamorphic rim	0.282981	1.07305e-05	0.000324631	2.63645e-05	0.00837194	0.000663886	0.282981	7.3975	86.2803	9.27356	0.379475
77-9-04	Metamorphic rim	0.282917	1.33515e-05	5.88539e-05	1.49652e-06	0.00196383	4.06211e-05	0.282917	5.1312	82.1071	6.93044	0.472164
77-9-05	Metamorphic rim	0.282949	1.04367e-05	3.06336e-05	4.48367e-07	0.00114139	9.99487e-06	0.282949	6.27357	89.7685	8.24278	0.369084
77-9-06	Metamorphic rim	0.282945	1.07165e-05	3.19637e-05	2.45003e-07	0.00112075	7.67668e-06	0.282945	6.10391	92.9966	8.14389	0.37898
77-9-07	Metamorphic rim	0.282963	1.10395e-05	3.91792e-05	2.03316e-07	0.00132281	3.49298e-06	0.282963	6.74306	89.0189	8.6954	0.390403
77-9-08	Metamorphic rim	0.282951	9.38891e-06	1.58423e-05	3.01196e-07	0.000610924	9.91115e-06	0.282951	6.33877	88.1408	8.27311	0.332031
77-9-09	Metamorphic rim	0.28295	1.01968e-05	2.95289e-05	4.40827e-07	0.00108343	7.66915e-06	0.28295	6.29676	95.2037	8.3854	0.3606
77-17
77-17-01	Metamorphic rim	0.282949	9.71713e-06	4.14639e-05	8.47459e-07	0.00144959	2.82249e-05	0.282949	6.2699	82.5932	8.08096	0.343638
77-17-02	Metamorphic rim	0.282939	9.22001e-06	1.24054e-05	1.25529e-07	0.000503588	8.50703e-06	0.282939	5.92181	80.5552	7.68963	0.326058
77-17-03	Metamorphic rim	0.282936	8.9347e-06	1.4032e-05	1.62949e-07	0.000616332	1.18281e-05	0.282936	5.81231	82.7354	7.62791	0.315968
77-17-04	Metamorphic rim	0.282922	8.40128e-06	2.65651e-05	2.32523e-07	0.00106777	1.69281e-05	0.282922	5.2891	82.1234	7.09048	0.297104
77-17-05	Metamorphic rim	0.282926	8.49621e-06	6.7747e-06	5.88367e-08	0.000298169	3.71694e-06	0.282926	5.44586	84.1216	7.29225	0.300461
77-17-06	Metamorphic rim	0.282949	8.63577e-06	2.29847e-05	3.22133e-07	0.00100517	8.43417e-06	0.282949	6.24566	84.7162	8.10435	0.305397
77-17-07	Metamorphic rim	0.282981	9.29565e-06	2.58001e-05	7.05768e-07	0.00122537	3.90383e-05	0.282981	7.38836	85.5378	9.26515	0.328733
77-17-08	Metamorphic rim	0.282955	1.00403e-05	0.000139591	6.95681e-06	0.00517773	0.000276939	0.282954	6.46075	88.4884	8.39551	0.355067
77-17-09	Metamorphic rim	0.282931	1.0049e-05	8.83877e-06	1.69742e-07	0.00038445	1.09146e-05	0.282931	5.60627	84.3399	7.45736	0.355375
77-17-10	Metamorphic rim	0.282973	9.91206e-06	4.6671e-05	1.33731e-06	0.001808	3.88566e-05	0.282973	7.12109	91.2442	9.1219	0.350532
77-17-11	Metamorphic rim	0.282941	8.76752e-06	2.52841e-05	2.33517e-07	0.00101671	3.6018e-06	0.282941	5.98231	85.1887	7.8512	0.310056
77-17-12	Metamorphic rim	0.282946	1.7e-05	6.04e-06	1.8e-07	0.0002045	8.7e-06	0.282946	6.15337	83.7	7.99066	0.601191	11.1699	0.153361
77-17-13	Metamorphic rim	0.282976	3.2e-05	2.698e-05	5.1e-07	0.000773	2e-05	0.282976	7.21429	83.7	9.05062	1.13165	11.7113	0.258099
77-17-14	Metamorphic rim	0.282969	2.2e-05	2.177e-05	2.8e-07	0.000663	1.1e-05	0.282969	6.96674	83.7	8.80332	0.778012	11.6396	0.126751
77-17-15	Metamorphic rim	0.283003	2.6e-05	1.444e-05	4.5e-07	0.000447	1.9e-05	0.283003	8.16913	83.7	10.0063	0.919469	11.6276	0.204405
77-17-16	Metamorphic rim	0.282972	1.9e-05	8.73e-06	4.2e-07	0.000288	1.2e-05	0.282972	7.07284	83.7	8.91015	0.671919	10.7829	0.265007
77-17-17	Metamorphic rim	0.282961	1.6e-05	3.51e-05	3.6e-07	0.0011118	9e-06	0.282961	6.68383	83.7	8.51961	0.565827	11.3043	0.202664
77-17-18	Metamorphic rim	0.282989	1.6e-05	1.309e-05	3e-07	0.0004239	9e-06	0.282989	7.67403	83.7	9.51121	0.565827	11.116	0.173454
77-17-19	Metamorphic rim	0.282964	1.5e-05	0.0001538	2e-06	0.004109	5.6e-05	0.282964	6.78992	83.7	8.61916	0.530463	10.4828	0.207634
Mafic migmatites
76-33
76-33-01	Metamorphic rim	0.283057	2e-05	1.599e-05	2.5e-07	0.00048	1.3e-05	0.283057	10.0788	87	11.9888	0.707284	8.41471	0.308405
76-33-02	Metamorphic rim	0.28306	2e-05	1.092e-05	2.3e-07	0.000353	1.1e-05	0.28306	10.1849	87	12.0952	0.707284	8.45755	0.313505
76-33-03	Metamorphic rim	0.283078	1.7e-05	1.798e-05	2.3e-07	0.000621	1.3e-05	0.283078	10.8214	87	12.7314	0.601191	8.18243	0.261611
76-33-04	Metamorphic rim	0.283049	2.9e-05	3.176e-05	6.8e-07	0.000805	2.1e-05	0.283049	9.79588	87	11.7049	1.02556	8.58406	0.0955746
76-33-05	Magmatic core	0.283071	1.8e-05	0.0009871	4e-06	0.02355	0.00017	0.283069	10.5739	91	12.5135	0.636555	6.86784	0.115216
76-33-06	Magmatic core	0.283068	1.6e-05	0.0012643	6.3e-06	0.03131	0.00032	0.283066	10.4678	91	12.3907	0.565827	6.54045	0.221272
76-33-07	Metamorphic rim	0.283056	2.1e-05	3.86e-05	3.4e-06	0.001301	9.9e-05	0.283056	10.0434	87	11.9521	0.742648	8.60778	0.236287
76-33-08	Magmatic core	0.283073	1.8e-05	0.0008828	4.2e-06	0.02185	0.00026	0.283071	10.6446	91	12.5905	0.636555	7.14542	0.21604
76-33-09	Metamorphic rim	0.283069	1.8e-05	2.77e-05	1.3e-06	0.00082	2.9e-05	0.283069	10.5032	87	12.4126	0.636555	8.68936	0.167208
76-33-10	Magmatic core	0.283084	2e-05	0.001092	1.3e-05	0.02721	0.00025	0.283082	11.0336	91	12.967	0.707284	6.93904	0.280283
76-13
76-13-01	Metamorphic rim	0.283061	1.9e-05	0.000552	6.5e-05	0.0137	0.0016	0.28306	10.2202	87	12.0994	0.671919	7.92672	0.305241
76-13-02	Magmatic core	0.283054	2.4e-05	0.000825	2.1e-05	0.02187	0.00089	0.283053	9.9727	91	11.9219	0.84874	6.98201	0.287404
76-13-03	Metamorphic rim	0.283073	2.2e-05	0.000336	1.7e-05	0.00743	0.00036	0.283072	10.6446	87	12.5363	0.778012	7.88665	0.363913
76-13-04	Magmatic core	0.283091	2e-05	0.001874	7e-05	0.0479	0.0021	0.283088	11.2812	91	13.1676	0.707284	7.12028	0.464614
76-13-05	Metamorphic rim	0.283082	1.9e-05	3.982e-05	7.4e-07	0.001215	2.4e-05	0.283082	10.9629	87	12.8717	0.671919	7.76421	0.173637
76-13-06	Magmatic core	0.283089	2.2e-05	0.000721	3.7e-05	0.018	0.0011	0.283088	11.2104	91	13.1662	0.778012	7.07453	0.222139
76-13-07	Metamorphic rim	0.283061	1.8e-05	3.11e-05	1.6e-06	0.001141	6.5e-05	0.283061	10.2202	87	12.1294	0.636555	8.0563	0.240376
76-13-08	Metamorphic rim	0.283076	2.5e-05	2.269e-05	3e-07	0.000669	1.4e-05	0.283076	10.7507	87	12.6604	0.884105	8.27744	0.282467
76-13-09	Metamorphic rim	0.283081	2.3e-05	9.93e-05	1.2e-06	0.002401	2.9e-05	0.283081	10.9275	87	12.8329	0.813376	8.46992	0.246376
76-13-10	Metamorphic rim	0.283048	2.2e-05	3.214e-05	3.1e-07	0.001051	1.2e-05	0.283048	9.76051	87	11.6695	0.778012	8.30469	0.375867
76-13-11	Magmatic core	0.283093	2.1e-05	0.001528	3e-05	0.03938	0.00099	0.28309	11.3519	91	13.2591	0.742648	7.25346	0.243932
76-13-12	Magmatic core	0.283075	2e-05	0.000755	2.6e-05	0.01924	0.00077	0.283074	10.7153	91	12.6689	0.707284	6.93221	0.214555
Note: (1) Zircon εHf(t) of sample number from 1-33-16 to 1-33-24, from 77-3-14 to 77-3-20, and from 77-17-12 to 77-17-19 are calculated at their weighted mean ages of 85.0Ma, 88.4Ma and 83.7Ma, respectively.
(2) Zircon U-Pb ages for εHf(t) calculation of sample 77-8 are from Qin et al. (2019); Zircon U-Pb ages of sample 76-33 and 76-13 used for calculation are from Niu et al. (2019) and Zhang et al. (2020)
